# Supplementary material for: Integration of Antimicrobials and Delivery Systems: Synergistic Antibiofilm Activity with Biodegradable Nanoemulsions Incorporating Pseudopyronine Analogs
Source: MDPI journal article supplement (doi:10.3390/antibiotics12081240), 2023-07-28
Supplement: s1 [file s1]

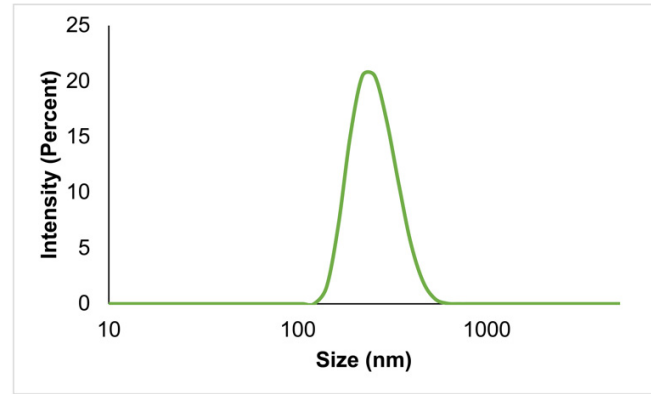

**Figure S1.** Dynamic light scattering histogram of PA-BNE as of Intensity (percent). The peak was observed ~255 nm

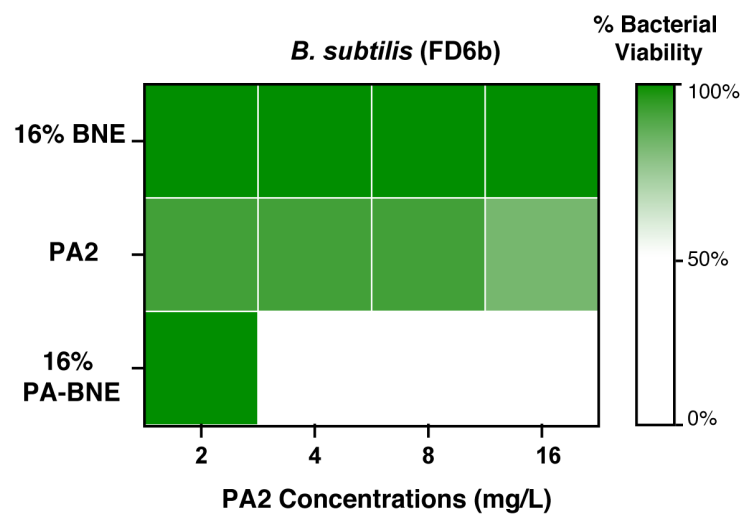

**Figure S2.** Minimum biofilm bactericidal concentrations (MBBC) of BNEs, PA2, and PA-BNE against *B. subtilis* biofilms represented as a heatmap after overnight treatment. The MBBC of PA2 alone was >100 mg/L.

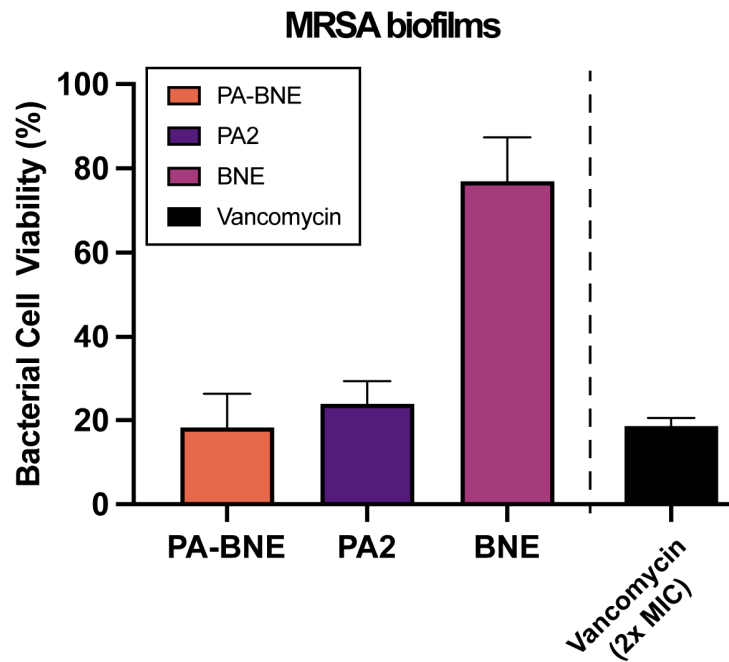

**Figure S3.** Bacterial viability of MRSA (IDRL-6169) biofilms after the treatment with materials and vancomycin control. The data shown are averages of replicates (n=5) with the error bars indicating standard deviations. PA-BNE (16%, 8 mg/L), PA2 (24 mg/L), BNE (16%) and 2x of MIC vancomycin (4 mg/L)
